# Supplementary material for: In situ-synthesized Co and N-doped mesoporous hollow silica spheres for the selective oxidation of ethylbenzene
Source: Royal Society of Chemistry journal article supplement (doi:10.1039/d3cp01144e), 2023-01-01
Supplement: d3cp01144e1.pdf [file d3cp01144e1.pdf]

## **Supplementary Information**

### **In situ-synthesized Co and N-doped Mesoporous Hollow Silica**

#### **Spheres for the Selective Oxidation of Ethylbenzene**

*Yingying Lan, Chengfeng Yi and Zhigang Liu \**

\* Advanced Catalytic Engineering Research Center of the Ministry of Education, College of Chemistry and Chemical Engineering, Hunan University, Changsha 410082, Hunan, China. E-mail: liuzhigang@hnu.edu.cn.

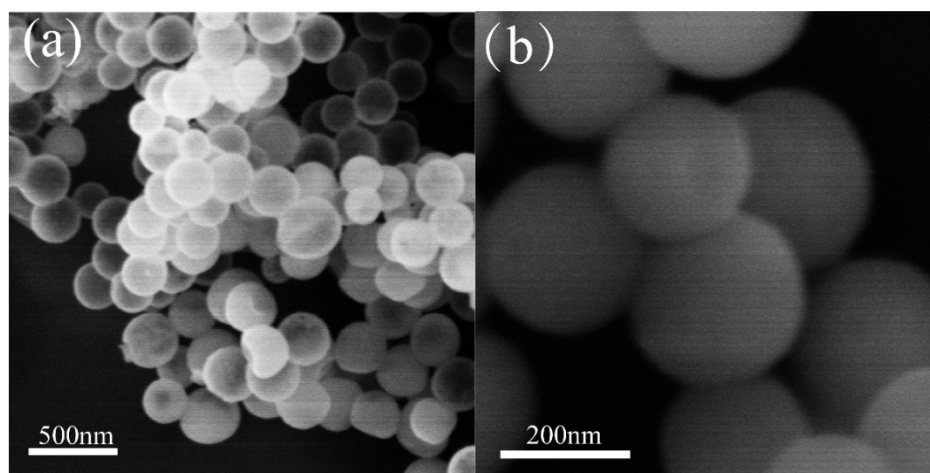

**Figure S1.** SEM images of mSiO<sub>2</sub>

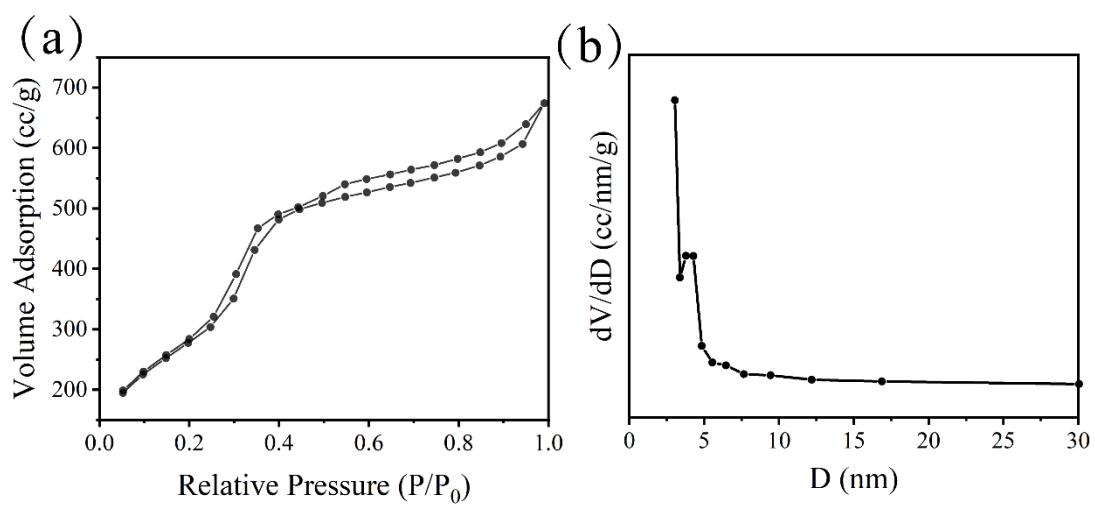

**Figure. S2.**  $N_2$  adsorption–desorption isotherm and the corresponding pore size distribution curve of  $mSiO_2$

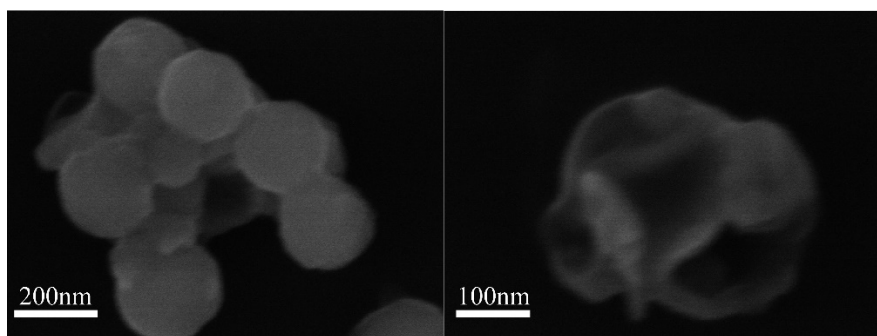

**Figure. S3.** SEM images of Co-N-C@mSiO<sub>2</sub>-0.10 catalyst used for six consecutive times

**Table S1.** Oxidation of ethylbenzene to acetophenone catalyzed by different catalysts prepared with different usage of benzaldehyde and pyrrole

| Entry | Benzaldehyde (g) | Pyrrole (mL) | CoCl <sub>2</sub> ·6H <sub>2</sub> O (g) | Con. <sup>[a]</sup> (%) | Sel. <sup>[b]</sup> (%) |
|-------|------------------|--------------|------------------------------------------|-------------------------|-------------------------|
| 1     | 0.50             | 0.35         | 0.10                                     | 86.1                    | 94.7                    |
| 2     | 0.73             | 0.50         | 0.10                                     | 93.1                    | 98.0                    |
| 3     | 1.00             | 0.70         | 0.10                                     | 83.9                    | 96.0                    |

Reaction condition: 15 mg catalysts, 1.0 mmol ethylbenzene, 3.5 mmol TBHP, 3.0 mL H<sub>2</sub>O, 80°C, 12 h.  
[a] conversion of ethylbenzene; [b] selectivity of acetophenone

**Table S2.** The Co contents of the prepared catalysts measured by ICP-MS

| Sample                             | Co (wt%) |
|------------------------------------|----------|
| Co-N-C@ mSiO <sub>2</sub> -0.03    | 2.1      |
| Co-N-C@ mSiO <sub>2</sub> -0.10    | 3.9      |
| Co-N-C@ mSiO <sub>2</sub> -0.15    | 4.2      |
| Co-N-C@ mSiO <sub>2</sub> -0.20    | 5.2      |
| Co-N-C@ mSiO <sub>2</sub> -0.10-H  | 3.4      |
| Co-N-C@ mSiO <sub>2</sub> -0.10-R6 | 2.5      |

**Table S3.** Structure parameters of the prepared catalysts

| Entry | Sample                             | $S_{\text{BET}}^{[\text{a}]}$ ( $\text{m}^2/\text{g}$ ) | $D_{\text{p}}^{[\text{b}]}$ (nm) | $V_{\text{p}}^{[\text{c}]}$ ( $\text{cm}^3/\text{g}$ ) |
|-------|------------------------------------|---------------------------------------------------------|----------------------------------|--------------------------------------------------------|
| 1     | mSiO <sub>2</sub>                  | 1102.3                                                  | 3.78                             | 1.04                                                   |
| 2     | N-C@mSiO <sub>2</sub>              | 40.4                                                    | 5.75                             | 0.06                                                   |
| 3     | Co-N-C@ mSiO <sub>2</sub> -0.03    | 25.0                                                    | 9.32                             | 0.11                                                   |
| 4     | Co-N-C@ mSiO <sub>2</sub> -0.10    | 33.8                                                    | 11.9                             | 0.10                                                   |
| 5     | Co-N-C@ mSiO <sub>2</sub> -0.15    | 46.9                                                    | 8.48                             | 0.10                                                   |
| 6     | Co-N-C@ mSiO <sub>2</sub> -0.10-R6 | 52.8                                                    | 6.72                             | 0.09                                                   |

<sup>[a]</sup>  $S_{\text{BET}}$ : Specific surface area; <sup>[b]</sup>  $D_{\text{p}}$ : Average pore size; <sup>[c]</sup>  $V_{\text{p}}$ : Total pore volume

**Table S4.** The element content of the prepared catalysts measured by XPS

| Sample                            | Co<br>(at%) | N<br>(at%) | Si<br>(at%) | O<br>(at%) | C<br>(at%) |
|-----------------------------------|-------------|------------|-------------|------------|------------|
| Co-N-C@ mSiO <sub>2</sub> -0.03   | 0.69        | 4.61       | 9.47        | 21.47      | 63.76      |
| Co-N-C@ mSiO <sub>2</sub> -0.10   | 0.71        | 4.54       | 13.03       | 27.87      | 53.84      |
| Co-N-C@ mSiO <sub>2</sub> -0.1-R6 | 0.32        | 2.97       | 16.37       | 43.39      | 36.96      |
